# Supplementary material for: Exploring the Linkages between Substance Use, Natural Disasters, Pandemics, and Intimate Partner Violence against Women: A Rapid Review in the Context of COVID-19
Source: MDPI journal article supplement (doi:10.3390/sexes2040040), 2021-12-14
Supplement: s1 [file s1]

## Supplementary Tables

**Table S1.** Pandemics, Natural Disasters, and IPV

| Author(s) & Year              | Country     | Study Design    | Disaster/Pandemic                            | Population(s)                                                                                                  | Research Aim                                                                                                                                                    | MMAT Score |
|-------------------------------|-------------|-----------------|----------------------------------------------|----------------------------------------------------------------------------------------------------------------|-----------------------------------------------------------------------------------------------------------------------------------------------------------------|------------|
| Anastario & Lawry (2009) [19] | USA         | Cross-sectional | Hurricane Katrina                            | Internally displaced people living in travel trailer parks in Mississippi post-Hurricane Katrina ( $n = 420$ ) | To assess the change in rates of gender-based violence after Hurricane Katrina among internally displaced people living in travel trailer parks in Mississippi. | 5          |
| Buttelt & Mohr (2009) [24]    | USA         | Pre-post        | Hurricane Katrina                            | Phone calls to the New Orleans Police Department 2002 – 2006                                                   | To investigate the New Orleans Police Department's responses to domestic violence pre- and post-Hurricane Katrina                                               | 3          |
| Enarson (1999) [70]           | Canada, USA | Cross-sectional | N/A                                          | Domestic violence programs, shelters, and transition houses ( $n = 77$ ) in the United States and Canada       | To examine disaster preparedness, impacts, and responses in domestic violence programs in Canada and the United States                                          | 3          |
| Frasier et al. (2004) [22]    | USA         | Cross-sectional | Hurricane Floyd                              | Women ( $n = 1,266$ ) 18+ working in 12 work sites in North Carolina                                           | To explore the role of stress and increased risk for IPV after Hurricane Floyd                                                                                  | 5          |
| Gearhart et al. (2018) [73]   | USA         | Longitudinal    | Hurricanes Charley, Frances, Ivan and Jeanne | Police reports ( $n = 819,684$ ) of assaults in Florida from 1999 - 2007                                       | To provide foundation for defining the impact of natural disasters on rates of IPV                                                                              | 4          |
| Harville et al. (2011) [26]   | USA         | Cross-sectional | Hurricane Katrina                            | Postpartum women ( $n = 248$ ) who gave birth between March 2006 and May 2007                                  | To examine the relationship between the experience of Hurricane Katrina and reported relationship aggression and violence amongst postpartum women              | 4          |
| Lewis et al. (2008) [27]      | USA         | Cross-sectional | 9/11 Terrorism Attacks                       | Pregnant women ( $n = 99$ ) attending antenatal clinics in New York                                            | To evaluate the association of lifetime interpersonal violence history and impact of the 9/11 terrorist attacks                                                 | 4          |

|                                  |           |                 |                            |                                                                                                                               |                                                                                                                                                                                                                            |   |
|----------------------------------|-----------|-----------------|----------------------------|-------------------------------------------------------------------------------------------------------------------------------|----------------------------------------------------------------------------------------------------------------------------------------------------------------------------------------------------------------------------|---|
| Parkinson (2019) [23]            | Australia | Qualitative     | Black Saturday bushfires   | Women ( $n = 30$ ) 18+ living in Shires of Mitchell or Murrindindi during the Black Saturday bushfires                        | To explore the link between disaster and increased violence against women in Australia                                                                                                                                     | 3 |
| Parkinson, D. & Zara (2013) [20] | Australia | Qualitative     | Black Saturday bushfires   | Women ( $n = 30$ ) 18+ and workers ( $n = 7$ ) in Shires of Mitchell or Murrindindi during the Black Saturday bushfires       | To examine the effect of the Black Saturday bushfires on domestic violence                                                                                                                                                 | 5 |
| Sabri, et al. (2020) [18]        | USA       | Qualitative     | COVID-19                   | Service providers ( $n = 17$ ) and female immigrant survivors of IPV ( $n = 45$ )                                             | To explore the perspectives of service providers and immigrant survivors of IPV on the impacts of COVID-19 on immigrant women, existing services for survivors, and strategies needed to enhance women's health and safety | 5 |
| Schumacher et al. (2010) [21]    | USA       | Pre-post        | Hurricane Katrina          | Married and cohabitating persons ( $n = 445$ ) living in the 23 southernmost counties of Mississippi during Hurricane Katrina | To establish the prevalence and correlates of IPV victimization in the 6 months before and after Hurricane Katrina                                                                                                         | 5 |
| Taft et al. (2009) [25]          | USA       | Cross-sectional | Mississippi River flooding | Women married or cohabitating ( $n = 205$ ) during the 1993 Mississippi River flooding                                        | To understand the relationship between PTSD, intimate relationship adjustment, and intimate relationship aggression among female flood victims                                                                             | 5 |

Table S2. Substance use and IPV

| Author(s) & Year              | Country   | Method          | Population(s)                                                                                                                                 | Research Aim                                                                                                                                                                                       | MMAT Score |
|-------------------------------|-----------|-----------------|-----------------------------------------------------------------------------------------------------------------------------------------------|----------------------------------------------------------------------------------------------------------------------------------------------------------------------------------------------------|------------|
| Ahmadabadi et al. (2019) [29] | Australia | Cohort          | Children ( $n = 822$ female, $n=531$ male) from the Mater-University of Queensland Study of Pregnancy Cohort of pregnant mothers              | To determine gender differences in the temporal association between IPV at a younger age and Substance Use Disorders                                                                               | 5          |
| Alhusen et al. (2019) [39]    | USA       | Cross-sectional | Women ( $n = 231,081$ ) from the 2004 – 2011 Pregnancy Risk Assessment Monitoring System                                                      | To analyze the association between IPV and small gestational age                                                                                                                                   | 5          |
| Bonomi et al. (2018) [54]     | USA       | Qualitative     | Women ( $n = 41$ ) with a disability and IPV or sexual violence exposure                                                                      | To understand the role of alcohol on IPV prevalence among college women with mental health disabilities                                                                                            | 5          |
| Bosch et al. (2017) [30]      | USA       | Cross-sectional | Women ( $n = 3,110$ ) 18+ from the 2005 Missouri Behavioral Risk Factor Surveillance System                                                   | To examine the prevalence of IPV and its relationship to other factors of health                                                                                                                   | 5          |
| Bunker et al. (2017) [52]     | Australia | Cohort          | Alcohol related-injuries ( $n = 12,296$ ) reported to hospitals in Queensland 2003 - 2012                                                     | To establish the prevalence of alcohol-related injuries originating in the home                                                                                                                    | 5          |
| Caldentey et al. (2017) [45]  | Spain     | Cross-sectional | Female patients ( $n = 52$ ) entering Hospital del Mar (Barcelona) for any medical/surgical reason and had a Substance Use Disorder diagnosis | To determine the prevalence of IPV among women with a Substance Use Disorder for entering a hospital for medical or surgical procedures                                                            | 5          |
| Crespo et al. (2017) [37]     | Spain     | Cross-sectional | Women who experienced IPV ( $n = 50$ ) and female controls ( $n = 50$ )                                                                       | To examine the relationship between hazardous drinking, use of psychotropic substances, and psychopathological symptoms among Spanish women who experienced IPV                                    | 3          |
| Cunradi & Mair (2015) [50]    | USA       | Cross-sectional | Married or cohabitating couples ( $n = 1,950$ ) residing in 50 California cities                                                              | To analyze whether discrepant (one partner) or concordant (both partners) patterns of heavy drinking, marijuana use, and smoking are associated with increased risk for male-to-female and female- | 5          |

|                                |             |                 |                                                                                                                                                  |                                                                                                                                                                           |   |
|--------------------------------|-------------|-----------------|--------------------------------------------------------------------------------------------------------------------------------------------------|---------------------------------------------------------------------------------------------------------------------------------------------------------------------------|---|
|                                |             |                 |                                                                                                                                                  | to-male partner violence among young adult couples                                                                                                                        |   |
| Curtis et al. (2019) [36]      | Australia   | Cross-sectional | Individuals ( $n = 5,118$ , 51.8% female) 18+ in Australia                                                                                       | To describe the relationship between alcohol use and family and domestic violence and examine differences between family violence, IPV, and other violence                | 2 |
| Decker et al. (2016) [43]      | USA         | Cohort          | Women ( $n = 2,669$ ) enrolled in the Women's Inter-agency HIV Study                                                                             | To identify the leading forms of GBV and poly-victimization and predictors of physical and sexual violence                                                                | 5 |
| Decker et al. (2020) [44]      | USA         | Cross-sectional | Female sex workers ( $n = 250$ cisgender, $n=63$ transgender) 15+ who picked up clients in public places $\geq 3$ times in the previous 3 months | To describe individual, partner, and structural influences on physical and sexual violence, and coercive condom negotiation with non-paying partners and clients          | 5 |
| Fanslow (2015) [60]            | New Zealand | Cross-sectional | Women ( $n = 2,543$ ) 18 – 64 years old who have or have had a regular male sexual partner                                                       | To identify the risk and protective factors of IPV and how those factors influence current versus previous exposure to IPV                                                | 5 |
| Flanagan et al. (2016) [42]    | USA         | Cross-sectional | Married, dating, or individuals in a romantic relationship ( $n = 25,604$ ) with experiences of PTSD and significant alcohol or cigarette use    | To examine the associations between PTSD, alcohol use, IPV victimization and perpetration and cigarette smoking                                                           | 5 |
| Gobin et al. (2015) [35]       | USA         | Cross-sectional | Female veterans ( $n = 369$ ) receiving care from Veterans Affairs                                                                               | To examine the association between alcohol misuse and past-year psychological IPV                                                                                         | 5 |
| Kontautaitė et al. (2018) [47] | Estonia     | Qualitative     | Estonian women ( $n = 38$ ) 18+ who were currently or previously used drugs                                                                      | To explore the discrimination Estonian women who use drugs experience in healthcare settings, from social support networks, and their vulnerability to violence and abuse | 5 |
| Lira et al. (2019) [74]        | USA         | Cross-sectional | Homicide victims ( $n = 41,587$ )                                                                                                                | To describe alcohol use among primary and corollary victims of IPV                                                                                                        | 5 |

|                             |                |                 |                                                                                                                                                |                                                                                                                                                     |   |
|-----------------------------|----------------|-----------------|------------------------------------------------------------------------------------------------------------------------------------------------|-----------------------------------------------------------------------------------------------------------------------------------------------------|---|
|                             |                |                 |                                                                                                                                                | homicide and the role of state alcohol policies among this population                                                                               |   |
| Low et al. (2017) [46]      | USA            | Cross-sectional | Young adults criminally at risk and their romantic partners ( $n = 184$ women, $n = 139$ men)                                                  | To examine the role of alcohol and cannabis use on couples' experiences of IPV                                                                      | 4 |
| Masseti et al. (2017) [72]  | USA            | Cross-sectional | Individuals ( $n = 38,317$ ) who completed the IPV module of the Behavioral Risk Factor Surveillance System                                    | To investigate the association between IPV and cancer screening                                                                                     | 5 |
| Mishra et al. (2018) [40]   | Australia      | Cohort          | Women with natural menopause ( $n = 6,138$ )                                                                                                   | To examine the association between IPV and age at natural menopause and quantify the effect mediated through smoking                                | 5 |
| Mumford et al. (2018) [57]  | USA            | Cross-sectional | Women ( $n = 6100$ ) in the Early Childhood Learning Birth Cohort                                                                              | To investigate the temporal relationship between patterns of maternal alcohol use from preconception to the parenting period                        | 5 |
| Nemeth et al. (2016) [38]   | USA            | Cross-sectional | Women ( $n = 398$ ) 18+ from three Ohio Appalachian counties                                                                                   | To establish prevalence of women's exposure to GBV in Ohio Appalachia and examine the association between GBV and smoking among women in the region | 4 |
| Nydegger et al. (2020) [51] | USA            | Qualitative     | Black women ( $n = 31$ ) at high-risk for HIV                                                                                                  | To qualitatively explore the similarities and differences of syndemic factors of substance use among Black women at risk of HIV                     | 5 |
| O'Brien et al. (2016) [53]  | USA            | Mixed methods   | Women ( $n = 22$ ) who had been mandated from CPS to complete the Mothers Overcoming Violence through Education and Empowerment (MOVE) program | To investigate the substance-related experiences of system-involved IPV survivors mandated to services                                              | 2 |
| Reichel (2017) [34]         | European Union | Cross-sectional | Women ( $n = 42,000$ ) who completed the EU-wide survey on violence against women                                                              | To explore the prevalence of physical and sexual violence against women in all 28 European Union member States                                      | 5 |

|                                 |                        |                 |                                                                                                                           |                                                                                                                                                                                                            |   |
|---------------------------------|------------------------|-----------------|---------------------------------------------------------------------------------------------------------------------------|------------------------------------------------------------------------------------------------------------------------------------------------------------------------------------------------------------|---|
| Sanz-Barbero et al. (2018) [56] | 28 countries in Europe | Cross-sectional | Ever partnered women ( $n = 5,976$ ) 18 – 29 years old                                                                    | To assess the prevalence and characteristics of experiencing physical, sexual, or psychological IPV among young women in the EU and the associated risk factors                                            | 5 |
| Sherrill et al. (2016) [49]     | USA                    | Mixed methods   | Female victims of IPV episodes involving substance use ( $n = 31$ )                                                       | To understand how substance use by IPV perpetrators and victims might enhance or suppress the perception of imminent physical IPV                                                                          | 4 |
| Soccio et al. (2015) [32]       | Australia              | Cross-sectional | Women ( $n = 102$ ) attending publicly funded sexual health clinics or a live-in drug and alcohol rehabilitation facility | To compare rates of late screening, abnormal Pap smears, and prevalence of psychosocial factors for cervical cancer between women in the community and those attending a live-in drug and alcohol facility | 4 |
| Sullivan et al. (2015) [41]     | USA                    | Cross-sectional | Women ( $n = 186$ ) 18+ who have experienced IPV in the past six months                                                   | To examine the differences between daily smokers and non-smokers among women who experience IPV                                                                                                            | 5 |
| Sullivan et al. (2016) [48]     | USA                    | Cohort          | Women currenting experiencing IPV ( $n = 41$ )                                                                            | To examine the association between current PTSD and the daily occurrence/co-occurrence of drug and alcohol use among women experiencing IPV                                                                | 5 |
| Suparare et al. (2020) [31]     | Australia              | Cross-sectional | Women with severe mental illnesses ( $n = 304$ )                                                                          | To examine the risk of past and current experiences of IPV in women with severe mental illness in pregnancy                                                                                                | 5 |
| Tedor et al. (2018) [28]        | USA and Japan          | Cohort          | Individuals married or living with a romantic partner in Japan ( $n = 1,600$ ) or the USA ( $n = 2,363$ )                 | To examine whether the gender differences in alcohol-related IPV is explained by alcohol-aggression expectancy                                                                                             | 4 |

|                           |           |                 |                                                                                                                                |                                                                                                                                                  |   |
|---------------------------|-----------|-----------------|--------------------------------------------------------------------------------------------------------------------------------|--------------------------------------------------------------------------------------------------------------------------------------------------|---|
| Ullman et al. (2015) [33] | USA       | Cross-sectional | Women ( $n = 1,863$ ) 18 – 71 years old                                                                                        | To examine the correlates of problem drinking in sexual assault victims                                                                          | 5 |
| Wilson et al. (2019) [58] | Sweden    | Cross-sectional | Couples ( $n = 11,461$ ) enrolled in Salut Child Health Promotion programs in Sweden                                           | To explore the relationship between partners' drinking patterns and women's experiences of violence in their relationship and early in pregnancy | 5 |
| Wilson et al. (2017) [59] | Australia | Qualitative     | Women ( $n = 18$ ) 18 – 50 years old who experienced fear or harm from an alcohol-affected male partner in Victoria, Australia | To explore the dynamics of drinking and IPV from the perspectives of women with lived experience of alcohol-related IPV                          | 5 |
| Yalch et al. (2018) [55]  | USA       | Cross-sectional | Young adult women ( $n = 654$ ) from a public university in Midwestern USA                                                     | To examine the main and moderating effects of temperament traits on the association between IPV and hazardous alcohol use                        | 2 |
